# Supplementary material
Source: PubMed Central journal article supplement (PMC3631972)
Supplement: supp_140.9.1994_DEV088963.pdf [file supp_140.9.1994_DEV088963.pdf]

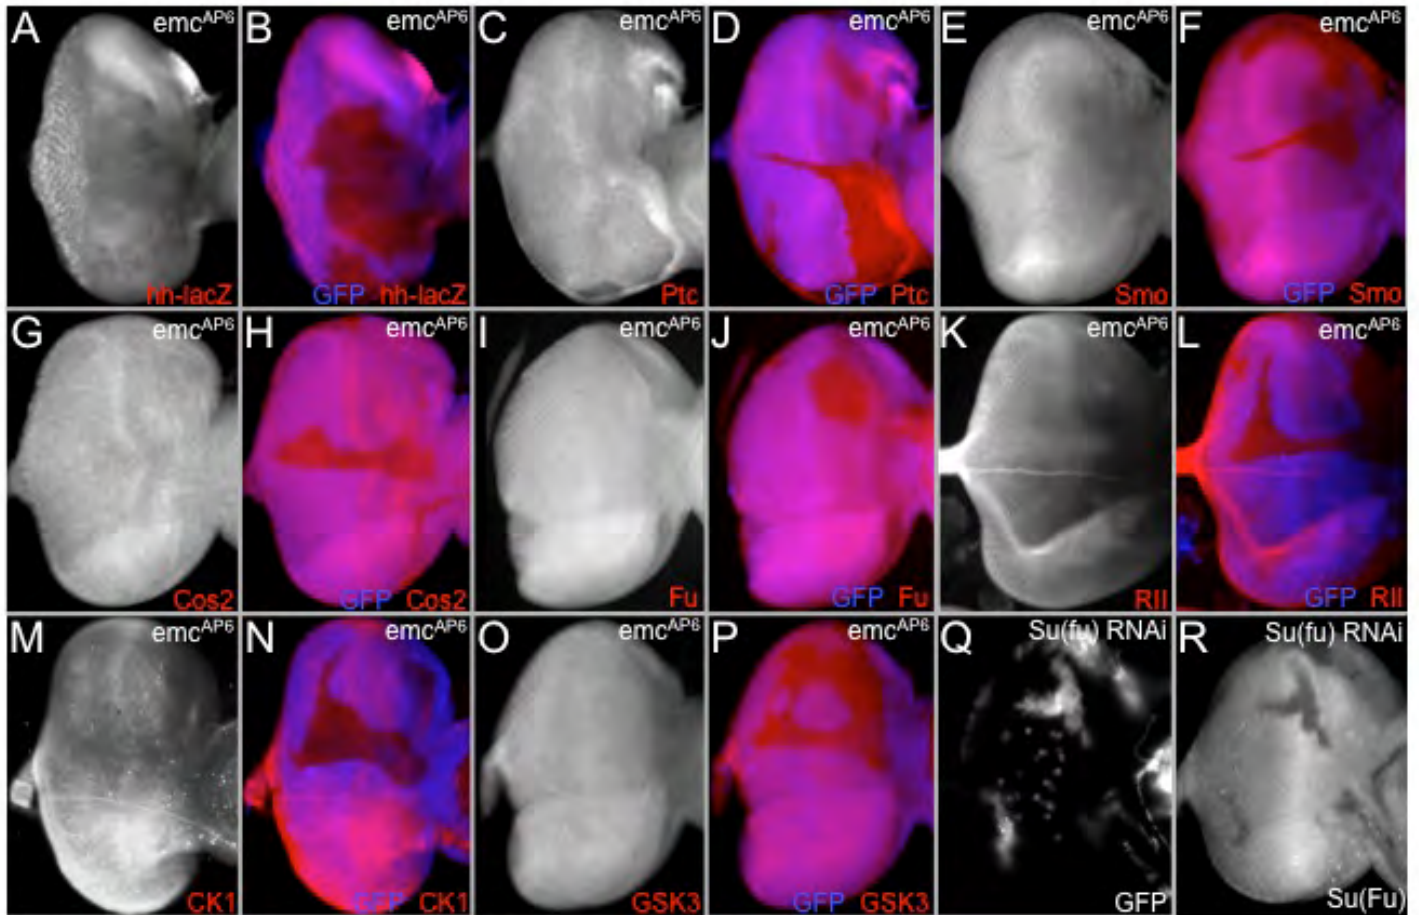

**Fig. S1. Emc regulation of the Hedgehog signaling pathway.** (A-P) Expression patterns of several Hedgehog signaling components in *emc* clones (*hs-flp[22]; FRT80B emc<sup>AP6</sup>/FRT80B M(3)i55 Ubi-GFP*). (Q,R) Expression of *Su(fu)* RNAi in clones (*hs-flp[22]; Act5C>y+>GAL4, UAS-GFP; UAS-Su(fu) RNAi*) is sufficient to dramatically reduce the level of *Su(fu)* in the eye disc. Anterior is towards the right. All markers and abbreviated genotypes are listed in each panel.

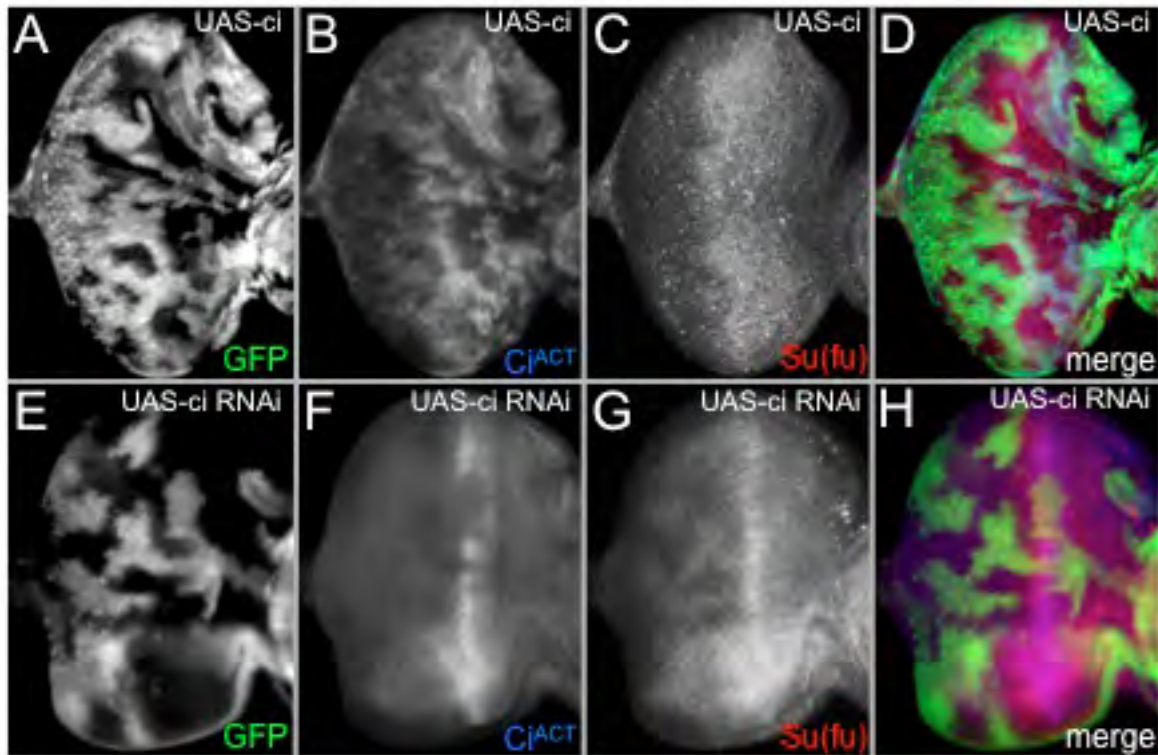

**Fig. S2. Ci<sup>ACT</sup> does not modulate Su(fu) expression.** (A-D) Overexpression of full-length Ci (*hs-flp[22]; Act5C>y+>GAL4, UAS-GFP; UAS-ci*) does not result in an increase in Su(fu) expression. (E-H) Reductions in Ci levels (*hs-flp[22]; Act5C>y+>GAL4, UAS-GFP; UAS-ci RNAi*) do not reduce Su(fu) expression within the eye disc. Anterior is towards the right. All markers and abbreviated genotypes are listed in each panel.

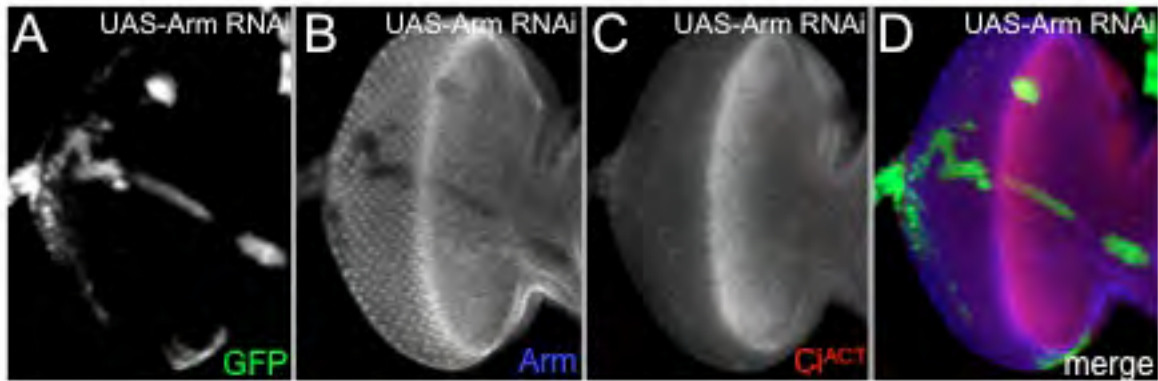

**Fig. S3. Armadillo does not regulate Ci<sup>ACT</sup> levels.** (A-D) Reductions in Arm levels (*hs-flp[22]; Act5C>y+>GAL4, UAS-GFP; UAS-arm RNAi*) do not reduce Ci<sup>ACT</sup> levels within the eye disc. Anterior is towards the right. All markers and abbreviated genotypes are listed in each panel.

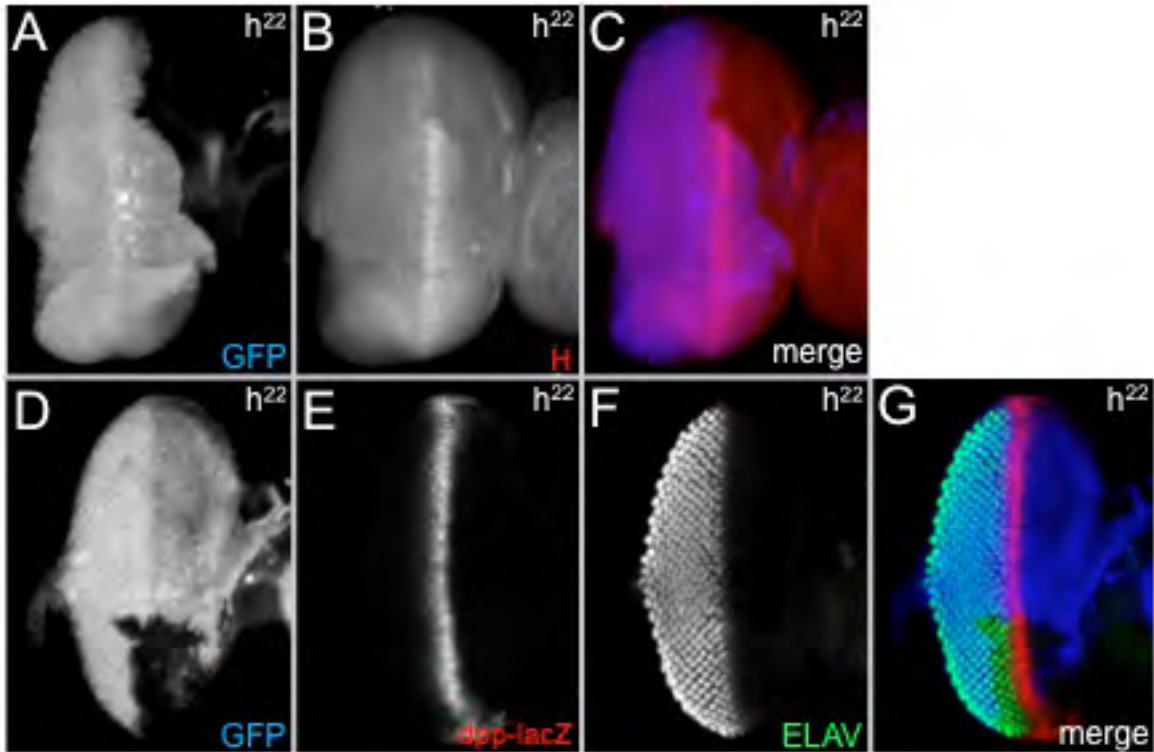

**Fig. S4. The furrow does not accelerate through *h* mutant clones.** (A-C) Hairy protein is absent in cells that are mutant for the *h<sup>22</sup>* null allele (*hs-flp[22]; FRT80B h<sup>22</sup>/FRT80B M(3)i55 Ubi-GFP*). (D-G) The furrow (assayed by *dpp-lacZ* and ELAV) does not accelerate through *h* mutant clones. Anterior is towards the right. All markers and abbreviated genotypes are listed in each panel.

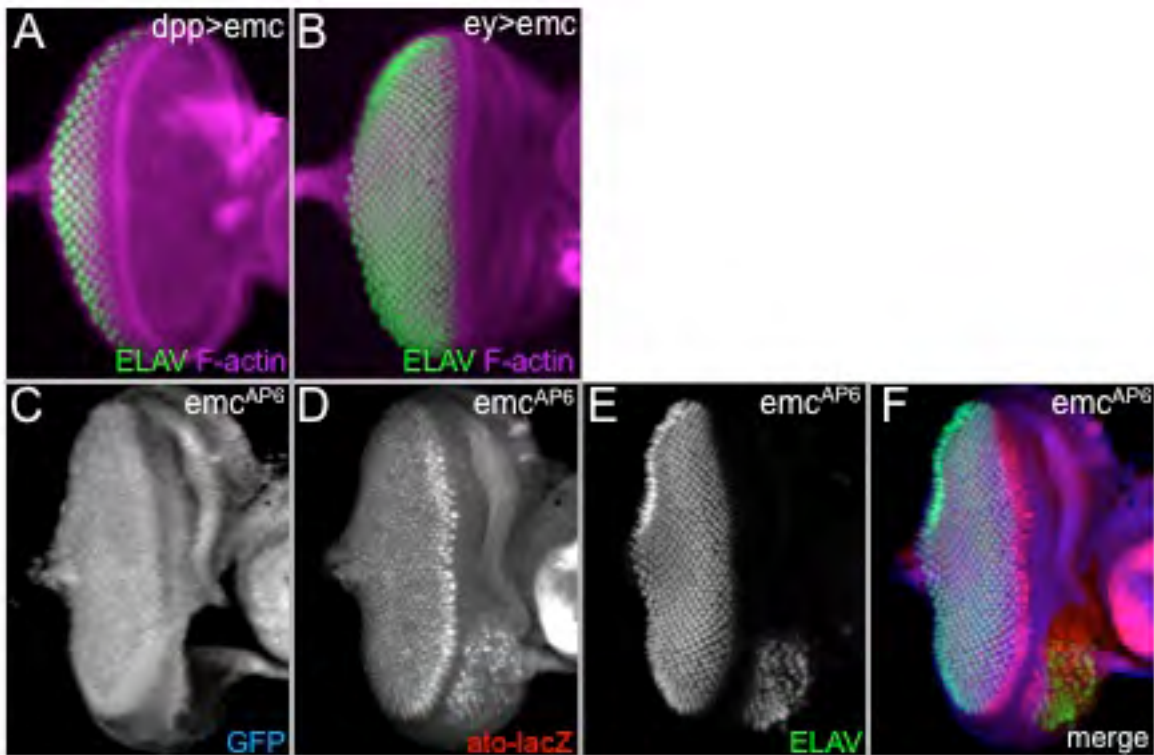

**Fig. S5. Emc inhibits initiation of ectopic furrows but cannot prevent the initiation of the normal furrow.** (A,B) Expression of *emc* with *dpp-GAL4* (A) or *ey-GAL4* (B) is insufficient to block initiation of the normal furrow. (C-F) *ato-lacZ* expression is activated in *emc* clones (*hs-flp[22]; FRT80B emc<sup>AP6</sup>/FRT80B M(3)i55 Ubi-GFP*) that contact the margin. Anterior is towards the right. All markers and abbreviated genotypes are listed in each panel.

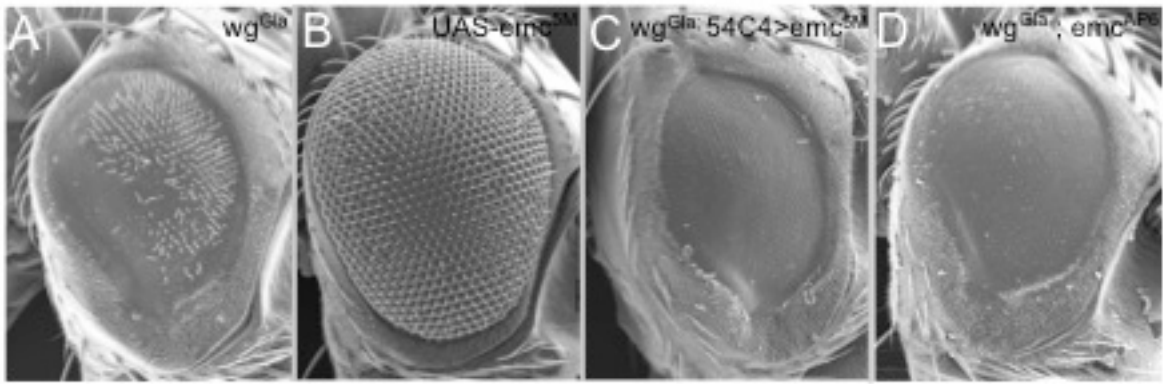

**Fig. S6. Emc does not function downstream of the Wg pathway.** Scanning electron microscope images of adult heads and compound eyes. **(A)** In the  $wg^{Gla}$  gain-of-function mutant, the photoreceptors are specified correctly but the cone and pigment cells fail to form properly, thus the adult eye has a flattened and glazed appearance. **(B)** Overexpression of *emc* by itself has no effect on eye development. **(C)** Expression of *emc* by *54C-GAL4*, which is expressed in the cone and pigment cells, fails to restore normal structure to the  $wg^{Gla}$  compound eye. **(D)** Removal of one copy of *emc* is also insufficient to suppress the rough eye phenotype of  $wg^{Gla}$ . Anterior is towards the right. All markers and abbreviated genotypes are listed in each panel.

Table S1. Raw data for charts in Fig. 1

| Disc number         | Time points (hours after egg lay) |      |       |      |      |      |      |       |       |       |       |
|---------------------|-----------------------------------|------|-------|------|------|------|------|-------|-------|-------|-------|
|                     | 78hr                              | 81hr | 84hr  | 87hr | 90hr | 93hr | 96hr | 99hr  | 102hr | 105hr | 108hr |
| 1                   | 0                                 | 4    | 6     | 9    | 7    | 8    | 10   | 14    | 15    | 17    | 21    |
| 2                   | 0                                 | 4    | 7     | 8    | 9    | 8    | 9    | 13    | 14    | 19    | 22    |
| 3                   | 0                                 | 2    | 5     | 8    | 8    | 7    | 10   | 14    | 11    | 16    | 17    |
| 4                   | 0                                 | 3    | 6     | 8    | 7    | 8    | 9    | 14    | 15    | 18    | 22    |
| 5                   | 0                                 | 3    | 5     | 8    | 7    | 8    | 7    | 13    | 11    | 17    | 21    |
| 6                   | 0                                 | 4    | 4     | 8    | 8    | 7    | 9    | 14    | 14    | 19    | 21    |
| 7                   | 0                                 | 3    | 3     | 9    | 7    | 10   | 6    | 15    | 14    | 17    | 17    |
| 8                   | 0                                 | 3    | 4     | 8    | 6    | 9    | 9    | 12    | 10    | 17    | 18    |
| 9                   | 0                                 | 3    | 3     | 8    | 7    | 9    | 11   | 14    | 11    | 16    | 18    |
| 10                  | 0                                 | 5    | 5     | 9    | 7    | 8    | 10   | 13    | 15    | 16    | 21    |
| 11                  | 0                                 | 3    | 6     | 8    | 7    | 8    | 10   | 14    | 15    | 20    | 22    |
| 12                  | 0                                 | 3    | 4     | 9    | 7    | 8    | 7    | 12    | 17    | 17    | 22    |
| 13                  | 0                                 | 4    | 5     | 8    | 7    | 8    | 10   | 12    | 16    | 18    | 21    |
| 14                  | 0                                 | 4    | 3     | 8    | 7    | 8    | 9    | 13    | 16    | 17    | 20    |
| 15                  | 0                                 | 3    | 4     | 9    | 7    | 8    | 10   | 13    | 12    | 19    | 19    |
| 16                  | 0                                 | 3    | 4     | 9    | 6    | 7    | 10   | 13    | 11    | 18    | 21    |
| 17                  | 0                                 | 1    | 5     | 7    | 7    | 9    | 10   | 13    | 13    | 17    | 20    |
| 18                  | 0                                 | 4    | 5     | 5    | 6    | 7    | 9    | 13    | 13    | 17    | 20    |
| 19                  | 0                                 | 2    | 6     | 6    | 6    | 8    | 11   | 14    | 12    | 18    | 21    |
| 20                  | 0                                 | 3    | 4     | 8    |      | 8    | 10   | 14    | 14    | 19    | 20    |
| 21                  |                                   | 5    | 5     | 8    |      | 8    | 11   | 13    | 13    | 20    | 22    |
| 22                  |                                   | 4    | 4     | 8    |      | 7    | 10   | 14    | 11    | 19    | 23    |
| 23                  |                                   | 6    | 4     | 9    |      |      | 8    | 13    | 13    | 19    | 21    |
| 24                  |                                   | 2    | 5     | 8    |      |      | 11   | 13    | 16    | 18    | 21    |
| 25                  |                                   | 2    | 4     | 7    |      |      | 8    | 14    | 13    | 18    | 23    |
| 26                  |                                   | 2    | 6     | 9    |      |      | 8    | 14    | 16    | 19    | 21    |
| 27                  |                                   | 3    | 3     | 9    |      |      | 9    | 13    | 16    | 18    | 21    |
| 28                  |                                   | 5    | 4     | 8    |      |      | 9    | 14    | 13    | 19    | 24    |
| 29                  |                                   | 3    | 6     | 7    |      |      | 10   | 13    | 13    | 18    | 21    |
| 30                  |                                   | 3    | 5     | 9    |      |      | 8    | 13    | 13    | 18    | 20    |
| 31                  |                                   | 5    | 6     | 8    |      |      | 9    | 13    | 13    | 18    |       |
| 32                  |                                   | 2    | 5     | 8    |      |      | 9    | 14    | 14    | 19    |       |
| 33                  |                                   |      |       | 8    |      |      | 9    | 13    | 16    |       |       |
| 34                  |                                   |      |       | 6    |      |      |      | 14    | 13    |       |       |
| 35                  |                                   |      |       | 5    |      |      |      |       | 12    |       |       |
| 36                  |                                   |      |       |      |      |      |      |       | 13    |       |       |
| Average row (ELAV)  |                                   | 3.31 | 4.72  | 7.91 | 7    | 8    | 9.24 | 13.38 | 13.53 | 17.97 | 20.7  |
| Average row (total) |                                   | 5.31 | 6.72  | 9.91 | 9    | 10   | 11.2 | 15.38 | 15.53 | 19.97 | 22.7  |
| s.d.                |                                   | 1.12 | 1.05  | 1.07 | 0.75 | 0.76 | 1.2  | 0.697 | 1.797 | 1.092 | 1.643 |
| s.e.m.              |                                   | 0.04 | 0.035 | 0.03 | 0.05 | 0.04 | 0.04 | 0.027 | 0.041 | 0.034 | 0.044 |
